# Supplementary material for: Serum Organ-Specific Anti-Heart and Anti-Intercalated Disk Autoantibodies as New Autoimmune Markers of Cardiac Involvement in Systemic Sclerosis: Frequency, Clinical and Prognostic Correlates
Source: MDPI journal article supplement (doi:10.3390/diagnostics11112165), 2021-11-22
Supplement: s1 [file s1]

## Supplemental Material

### Supplementary Table SI. AIDA positivity and follow-up events.

|                                               | AIDA positive<br>n=64 | AIDA negative<br>n=51 | p-value |
|-----------------------------------------------|-----------------------|-----------------------|---------|
| Clinical worsening of cardiac symptoms, n (%) | 8 (12.5)              | 7 (13.7)              | >0.99   |
| Pulmonary arterial hypertension, n (%)        | 0 (0.0)               | 1 (2.0)               | 0.44    |
| Right heart failure, n (%)                    | 0 (0.0)               | 1 (2.0)               | 0.44    |
| Left heart failure, n (%)                     | 1 (1.6)               | 1 (2.0)               | >0.99   |
| Non sustained ventricular tachycardia, n (%)  | 2 (3.1)               | 1 (2.0)               | >0.99   |
| Implantable cardioverter defibrillator, n (%) | 1 (1.6)               | 2 (3.9)               | 0.58    |
| Coronary artery disease, n (%)                | 1 (1.6)               | 2 (3.9)               | 0.58    |
| Any arrhythmia (yes), n (%)                   | 6 (9.4)               | 2 (3.9)               | 0.22    |
| Death, n (%)                                  | 4 (6.2)               | 1 (2.0)               | 0.38    |

Data are expressed as n (%) and mean±SD (or median, IQR). See Table 1 for abbreviations
